# Supplementary material for: Drosophila TNFRs Grindelwald and Wengen bind Eiger with different affinities and promote distinct cellular functions
Source: PubMed Central journal article supplement (PMC8024323; doi:10.1038/s41467-021-22080-9), 2021-04-06
Supplement: 41467_2021_22080_MOESM1_ESM.pdf [file 41467_2021_22080_MOESM1_ESM.pdf]

# Drosophila TNFRs Grindelwald and Wengen bind Eiger with different affinities and promote distinct cellular functions

Palmerini et al.

## SUPPLEMENTARY INFORMATION

**A**

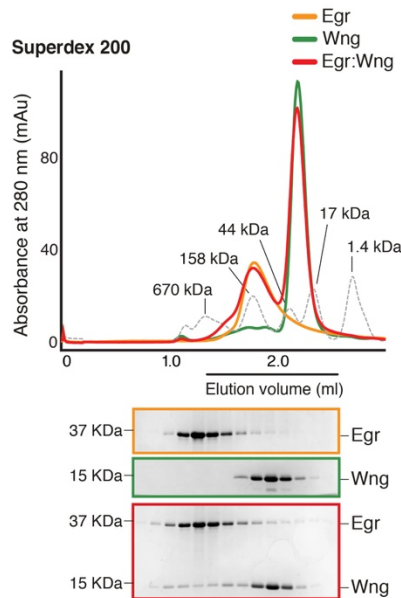

**B**

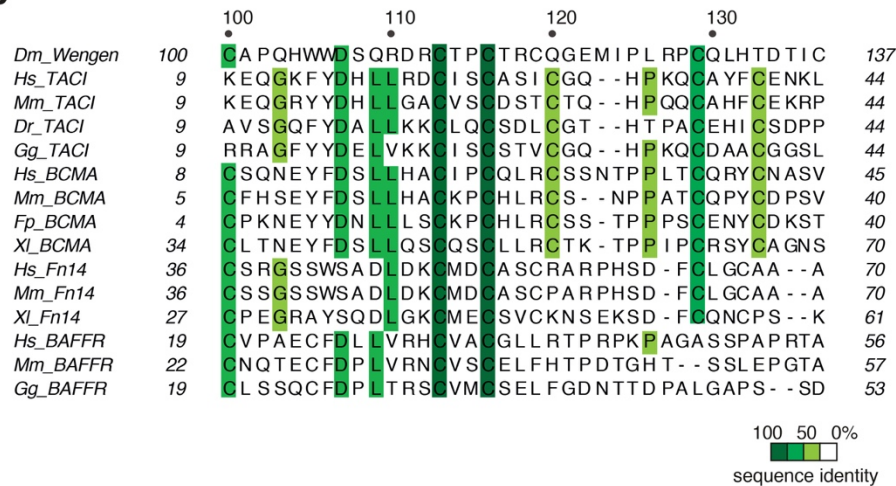

### Supplementary Figure S1. Characterization of the Wng extra-cellular domain. A

Analytical SEC of the Egr<sup>146-409</sup>:Wng<sup>78-201</sup> complex at 30  $\mu$ M concentration. Peak fractions were separated on SDS-PAGE and Coomassie-stained. Results of SEC runs and SDS-PAGES were confirmed by successful replicate experiments. **B** Sequence alignment of the CRD of

Wng with human Fn14, BCMA, BAFFR, and the second CRD of TACI and their orthologues, coloured by percentage of sequence identity.

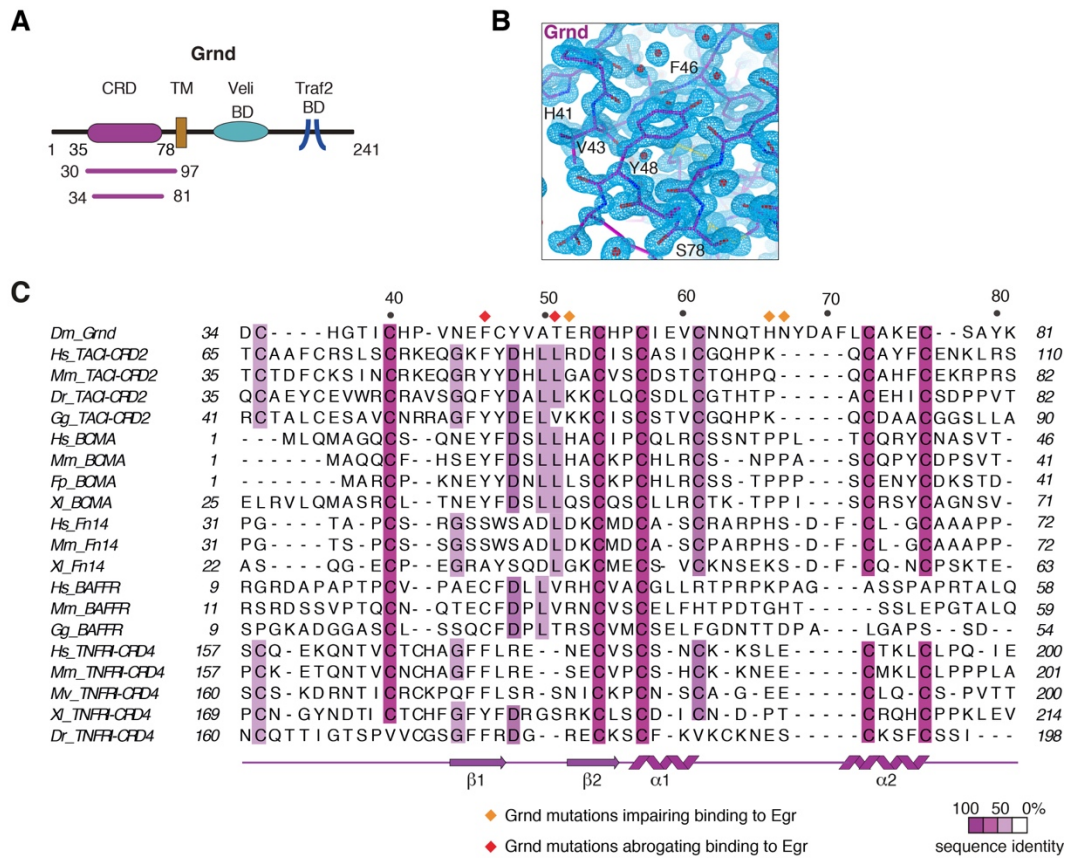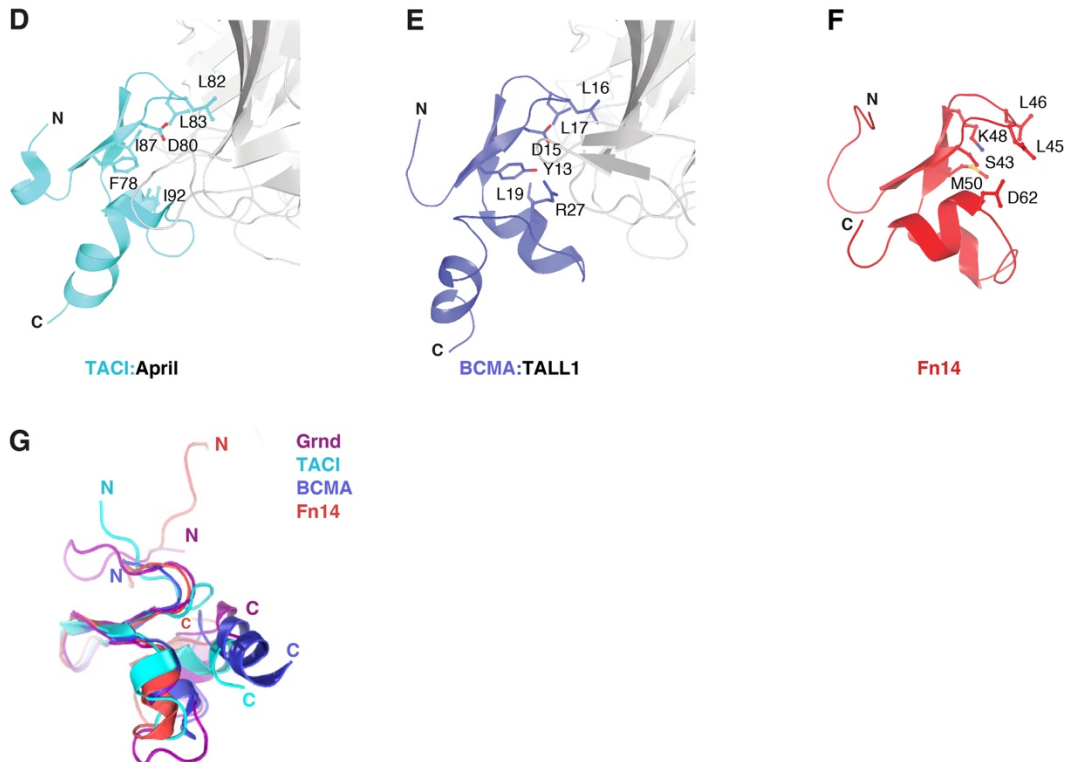

**Supplementary Figure S2. Organization of the Grnd extra-cellular domain.** **A** Domain structure of Grnd, showing the construct designed initially on the basis of primary sequence analysis, and the one obtained by limited proteolysis and used for structure determination. **B** Representative view of 2Fo-Fc electron density map contoured at 1.5  $\sigma$  level for Grnd-ECD centred around Phe-46 (balls-and-stick representation in purple). Water solvent molecules are depicted as red spheres. **C** Sequence alignment of the CRD of Grnd with orthologues of Fn14, BCMA, BAFFR, the second CRD of TACI, and the fourth CRD of TNFRI, coloured by percentage of sequence identity. The secondary structure elements of Grnd-ECD derived from the crystallographic structure are displayed below the sequences. **D-E** Cartoon representation of complexes between the human TNF ligands and single CRD-receptors folding as Grnd, visualized with the same orientation of Fig. 2B. In D, April:TACI-CRD2 (PDB ID 1XU1, ligand in grey, receptor in cyan); in E, TALL1:BCMA (PDB ID 10QD, ligand in grey, receptor in blue). **F** Structure of Fn14-ECD (PDB ID 2RPJ, in red). For all receptors, residues involved in ligand binding are shown in balls-and-sticks. **G** Cartoon representation of the superposition of Grnd-ECD (purple) with TACI (cyan), BCMA (blue) and Fn14 (red) based on the largest rigid body common to all structures calculated by the Rapido server (<http://rapido.embl-hamburg.de/>). The structural alignment carried out this way showed that Grnd/TACI superpose with an RMSD of 5.2 Å, while Grnd/BCMA and Grnd/Fn14 superpose with an RMSD of 4.4 Å.

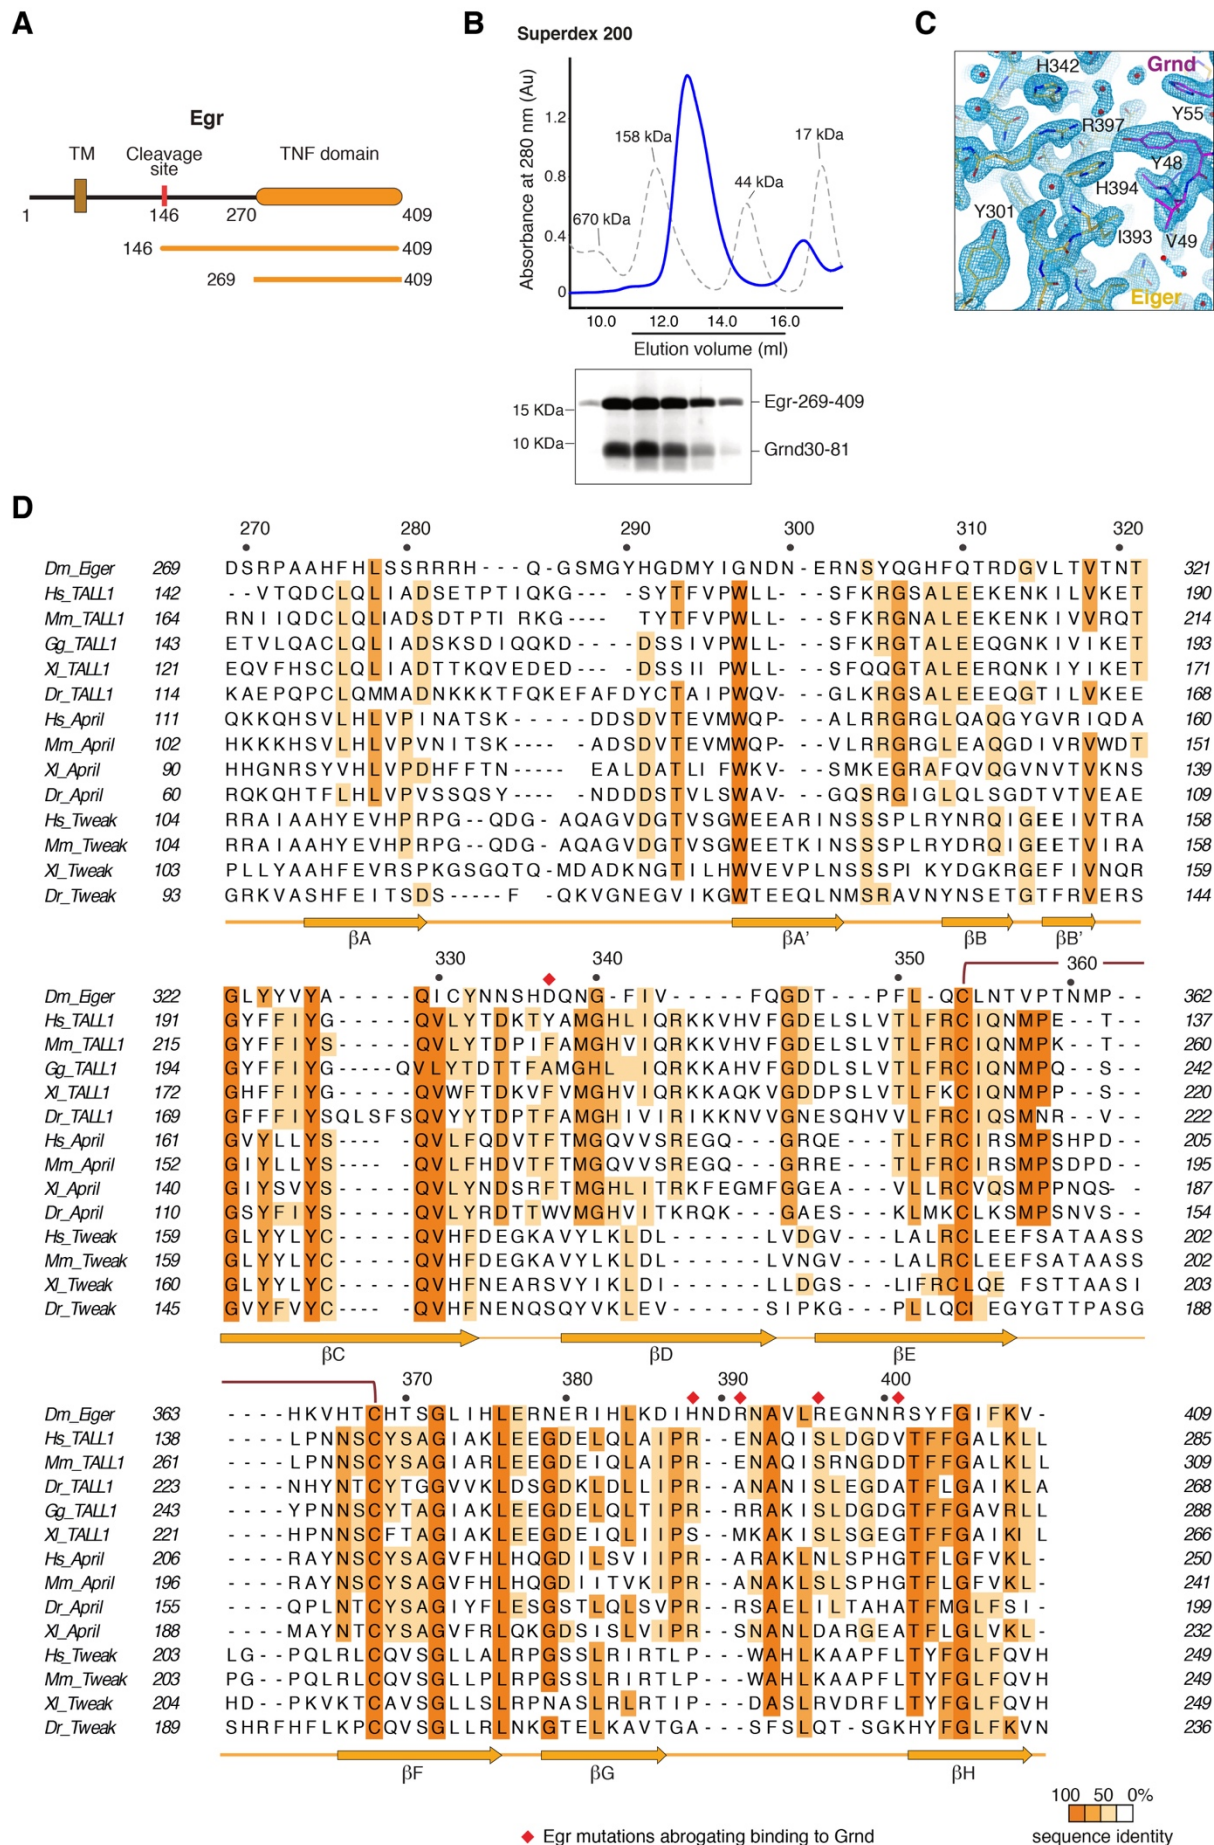

**Supplementary Figure S3. Sequence analysis of the Egr TNF-homology domain. A**

Domain structure of Egr, showing the constructs encompassing the entire extra-cellular portion after TACE cleavage, or obtained by limited proteolysis for structure determination. **B** Analytical SEC of the trypsinized Eiger<sup>269-409</sup>:Grnd<sup>30-81</sup> complex showing that the trimmed constructs still form hetero-hexamers. Peak fractions were separated on SDS-PAGE and Coomassie-stained. The SEC run and SDS-PAGE were confirmed by successful replicate experiments. **C** Representative view of 2Fo-Fc electron density map at the Egr:Grnd interface contoured at 1.5  $\sigma$  level (blue) with balls-and-sticks representation of the corresponding Eiger (yellow) and Grnd (purple) chains. Water solvent molecules are depicted as red spheres. **D** Sequence alignment of the Eiger TNF-homology domain with amino acids coloured by sequence identity calculated on *Drosophila melanogaster* Egr (short isoform) and orthologues of TALL1, April and Tweak from *Homo sapiens*, *Mus musculus*, *Gallus gallus*, *Danio rerio*, and *Xenopus laevis*. Secondary structure elements of Egr are displayed below the sequences. Residues essential for Grnd binding are marked by red rhombuses.

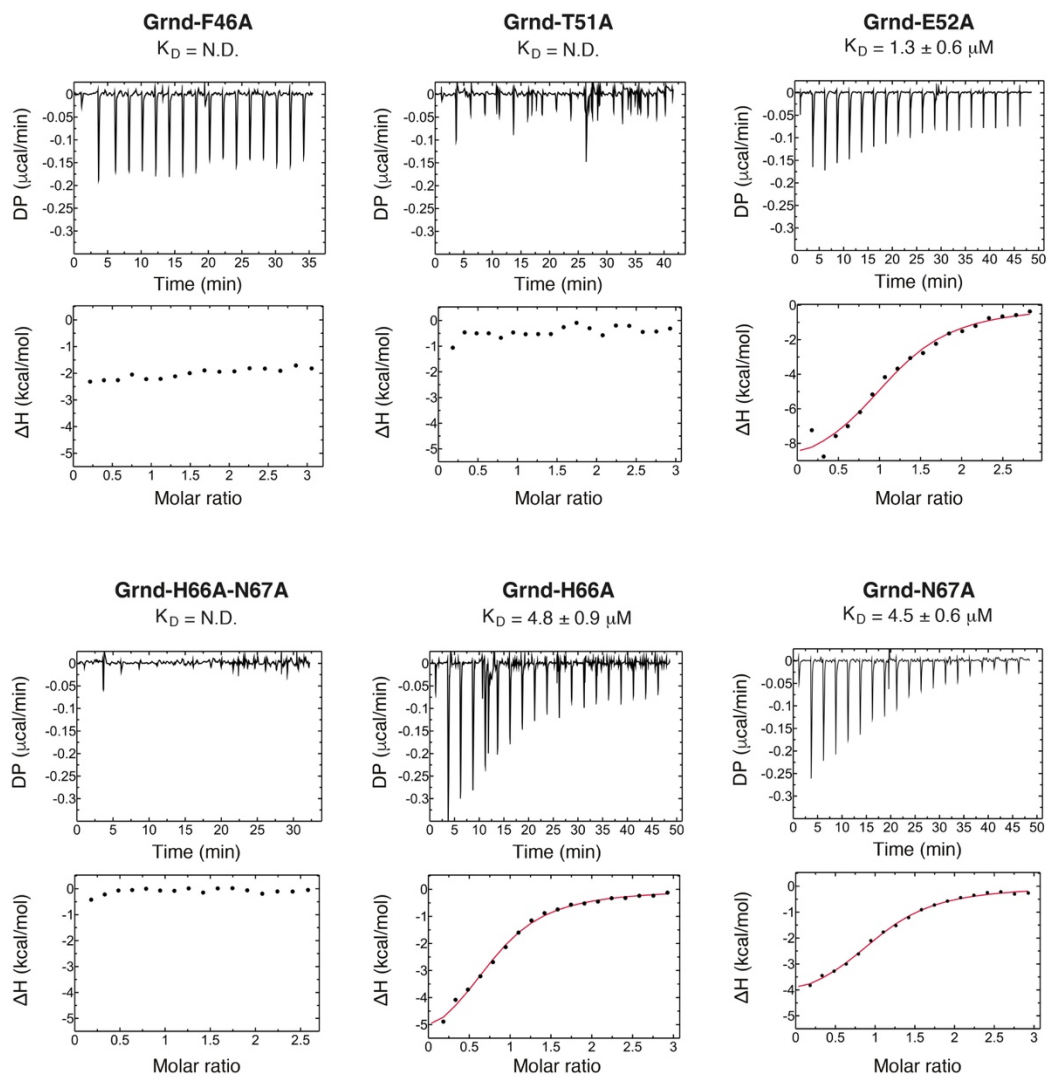

**Supplementary Figure S4. Thermodynamic characterization of the Eiger:Grnd interaction.** ITC measurements of the binding affinity between Egr<sup>146-409</sup> and Grnd<sup>30-97</sup> carrying the indicated mutations.  $K_D$  is reported as mean  $\pm$  error fitting of the ITC data with the isotherm (red line). All reactions are exothermic.

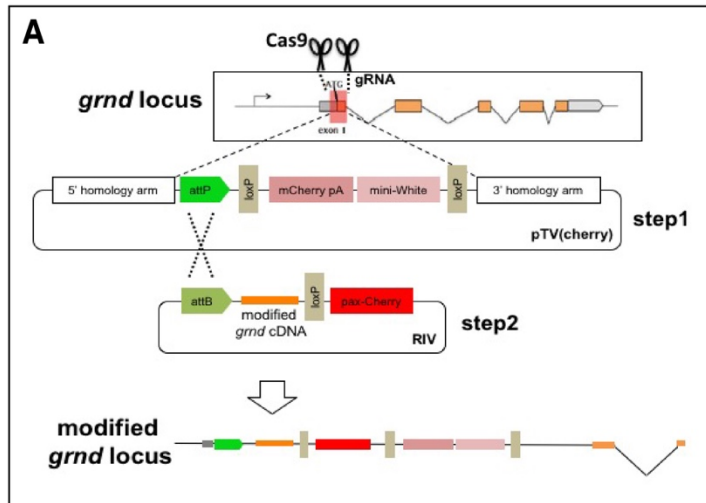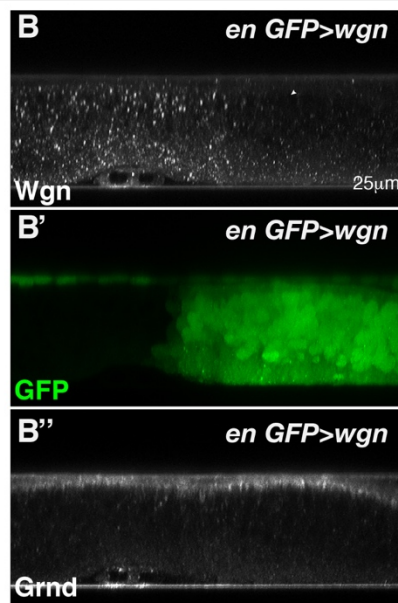

**Supplementary Figure S5. Egr and Wgn localise to distinct vesicles.** A *grnd* editing by accelerated homologous recombination. Schematics illustrating the different steps employed to edit the *grnd* locus. The editing allows replacing the first exon of *grnd* (the area between the two scissors) with cDNAs encoding wildtype *grnd* or *grnd* harbouring different point mutations. For detailed description see Methods. **B-B''** Transversal sections of dissected wing discs driving the expression of Wgn RNAi in the engrailed domain (labelled in green), showing that the majority of Wgn localises to intracellular vesicles. Wgn knockdown does not change the localisation of Grnd (B''). Results presented in panel B-B'' were confirmed by successful replicate experiments.

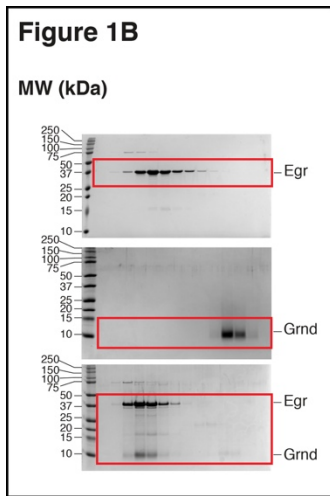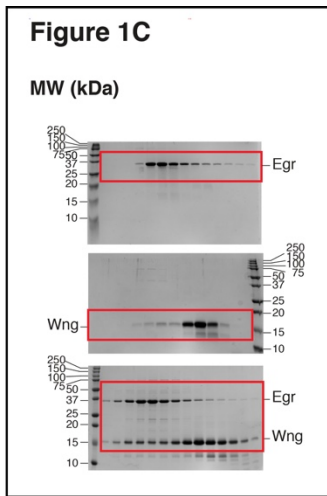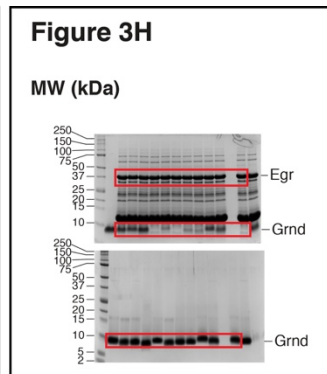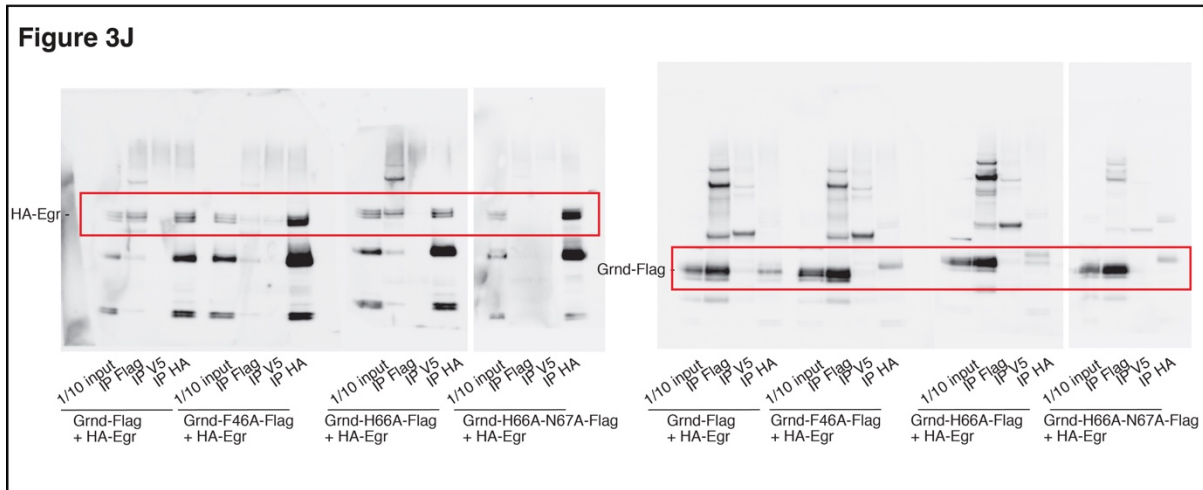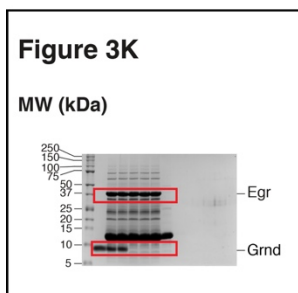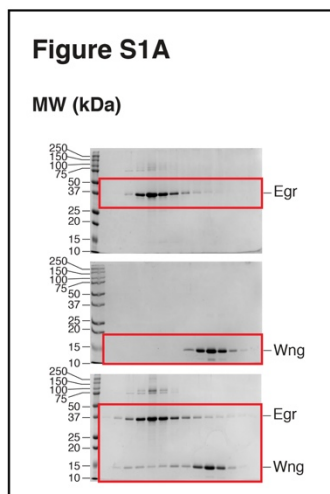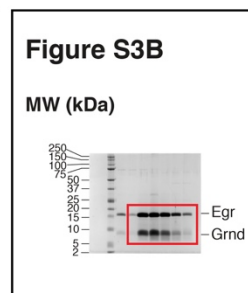

**Supplementary Figure S6. Uncropped images of SDS-PAGES and immunoblots presented in the main and supplementary figures.**



| PRIMER NAME           | SEQUENCE                                                                 | VECTOR                                |
|-----------------------|--------------------------------------------------------------------------|---------------------------------------|
| <b>BIOCHEMISTRY</b>   |                                                                          |                                       |
| Grnd30_For            | CGCGCGCCATGGGTGGAGAGAGTAGGGATTGCCAT                                      | pETM14-His-Grnd30-97                  |
| Grnd97_Rev            | GCGCGCGTCGACTTACTGGGTATTCTGGATGTCCAG                                     | pETM14-His-Grnd30-97                  |
| Grnd-H36A_For         | GAGAGAGTAGGGATTGCGCTGGCAGCATCTGTCATG                                     | pETM14-His-Grnd30-97-H36A             |
| Grnd-H36A_Rev         | CATGACAGATCGTGCCAGCGCAATCCCTACTCTCTC                                     | pETM14-His-Grnd30-97-H36A             |
| Grnd-F46A_For         | CTGTATCCGGTCAATGAAGCATGCTATGTTGCAACGGAGAG                                | pETM14-His-Grnd30-97-F46A             |
| Grnd-F46A_Rev         | CTCTCCGTTGCAACATAGCATGCTTCAATGACCGGATGACAG                               | pETM14-His-Grnd30-97-F46A             |
| Grnd-Y48A_For         | CCGGTCAATGAATTTTGCCTGTTGCAACGGAGAGATGT                                   | pETM14-His-Grnd30-97-Y48A             |
| Grnd-Y48A_Rev         | ACATCTCTCCGTTGCAACAGCGCAAAATTCATTGACCGG                                  | pETM14-His-Grnd30-97-Y48A             |
| Grnd-T51A_For         | GAATTTTGTATGTTGCAGCGGAGAGATGTCATCCGTG                                    | pETM14-His-Grnd30-97-T51A             |
| Grnd-T51A_Rev         | CACGGATGACATCTCTCCGCTGCAACATAGCAAAATTC                                   | pETM14-His-Grnd30-97-T51A             |
| Grnd-E52A_For         | TTTGCTATGTTGCAACGGCAGAGATGTCATCCGTGCAT                                   | pETM14-His-Grnd30-97-E52A             |
| Grnd-E52A_Rev         | ATGCACGGATGACATCTCCGCTGCAACATAGCAAA                                      | pETM14-His-Grnd30-97-E52A             |
| Grnd-H66A-N67A_For    | TCTGCAATAATCAAACCGCGCTACGATGCGTTTCTGTGCGC                                | pETM14-His-Grnd30-97-H66A-N67A        |
| Grnd-H66A-N67A_Rev    | GCGCACAGAAACGCATCGTAGCGGGGTTGATTATTGCAGA                                 | pETM14-His-Grnd30-97-H66A-N67A        |
| Grnd-H66A_For         | GGTCTGCAATAATCAAACCGCAACTACGATGCGTTTCTG                                  | pETM14-His-Grnd30-97-H66A             |
| Grnd-H66A_Rev         | CAGAAACGCATCGTAGTTGGCGGTTTATTATTGCAGACC                                  | pETM14-His-Grnd30-97-H66A             |
| Grnd-N67A_For         | GCAATAATCAAACCGCAACTACGATGCGTTTCTGTGC                                    | pETM14-His-Grnd30-97-N67A             |
| Grnd-N67A_Rev         | GCACAGAAACGCATCGTAGCGTGGGTTTATTATTGC                                     | pETM14-His-Grnd30-97-N67A             |
| Grnd-F71A_For         | ACCCACAACACTACGATGCGGCTCTGTGCGCAAGGAATGT                                 | pETM14-His-Grnd30-97-F71A             |
| Grnd-F71A_Rev         | ACATTCCTTGGCGCACAGACCGCATCGTAGTTGTTGGGT                                  | pETM14-His-Grnd30-97-F71A             |
| Grnd-K75A_For         | GATGCGTTTCTGTGCGCGCGAATGTTGAGCTTACAA                                     | pETM14-His-Grnd30-97-K75A             |
| Grnd-K75A_Rev         | TTGTAAGCTGAACATTCGCGCGCGCACAGAAACGCATC                                   | pETM14-His-Grnd30-97-K75A             |
| Eiger-146_For         | CGCGCGAGATCTGGCGCAGACTACGAGGAC                                           | pET43-His-Eiger146-409                |
| Eiger-409_Rev         | CGCGCGGTCGACTTACACCTTGAAGATGCCAAAGTA                                     | pET43-His-Eiger146-409                |
| Eiger-409_Rev         | CGCGCGGTCGACTTACACCTTGAAGATGCCAAAGTA                                     | pET100-Strep-Eiger146-409             |
| Eiger-146_For         | CGCGGCTAGCGGCGCAGACTACGAGGAC                                             | pET100-Strep-Eiger146-409             |
| Eiger-N333A_For       | GCCCAGATATGCTACGCCAACTCGCACGACCAG                                        | pET100-Strep-Eiger146-409-N333A       |
| Eiger-N333A_Rev       | CTGGTCTGCGAGTTGGCGTAGCATATCTGGGC                                         | pET100-Strep-Eiger146-409-N333A       |
| Eiger-D337A_For       | CTACAACAACCTCGCACGCCAGAACGGATTATCG                                       | pET100-Strep-Eiger146-409-D337A       |
| Eiger-D337A_Rev       | CGATAAATCCGTTCTGGCGTGCAGTTGTTGTAG                                        | pET100-Strep-Eiger146-409-D337A       |
| Eiger-H338A-R391A_For | ATCCATCTGAAGGACATTGCCAACGATGCCAATGCAGTTCTGCGG                            | pET100-Strep-Eiger146-409-H338A-R391A |
| Eiger-H338A-R391A_Rev | CCGCAGAACTGCATTGGCATCGTTGGCAATGTCCTTCAGATGGAT                            | pET100-Strep-Eiger146-409-H338A-R391A |
| Eiger-R396A_For       | TCGCAATGCAGTTTGGCGGAGGAAACAACCGAA                                        | pET100-Strep-Eiger146-409-H396A-R401A |
| Eiger-R396A_Rev       | TTCGGTTGTTCCCTCCGCCAGAACTGCATTGCGA                                       | pET100-Strep-Eiger146-409-H396A-R401A |
| Eiger-R401A_For       | TGGCGGAGGAAACAACGCAAGCTACTTTGGCATCTT                                     | pET100-Strep-Eiger146-409-H396A-R401A |
| Eiger-R401A_Rev       | AAGATGCCAAAGTAGCTTGCCTGTTTCCCTCCGCCA                                     | pET100-Strep-Eiger146-409-H396A-R401A |
| Wng-78_For            | CGCGCGCCATGGGTAACACAGACATAGCGCCA                                         | pETM14-His-Wng78-201                  |
| Wng-201_Rev           | CGCGCGCTCGAGTACGCCAGTCTGCCAGTCAAG                                        | pETM14-His-Wng78-201                  |
| <b>FLIES</b>          |                                                                          |                                       |
| grnd-5'-KO-pCFD4-For  | TATATAGGAAAGATATCCGGGTGAACCTCgagcgctctggccgcttacGTTTTAGAGCTAGAAATAGCAAG  | pCFD4                                 |
| grnd-3'-KO-pCFD4-Rev  | ATT TTAACCTGCTAT TTCTAGCTCTAAACtgaactgcatagaaccgccGACGTTAAATTGAAAATAGGTC | pCFD4                                 |
| Homology-arm-I-sense  | GCGGCCCGCTATAGTTCATATTGGGATACTGGGAATTC                                   |                                       |
| Homology-arm-I-anti   | GGTACCGCGCCAGACGCTAAC                                                    |                                       |
| Homology-arm-II-sense | ACTAGTAGGTTTTTCCAGCTGGACTTAATTG                                          |                                       |
| Homology-arm-II-anti  | GGCGGCCATAAACGTTGTGGCGTGG                                                |                                       |

**Supplementary Table S1. PCR primers.**
